# Supplementary material for: Genome-Wide Gene Expression Profiles in Antioxidant Pathways and Their Potential Sex Differences and Connections to Vitamin C in Mice
Source: MDPI journal article supplement (doi:10.3390/ijms140510042), 2013-05-10
Supplement: s1 [file s1]

## Sheet: Table S1
Supplementary Table S1. Gene correlations among altered, partners, and QTL genes of Gulo in female mice
Spearman Rank Correlation (rho)
P e a r s o n r		Trait1	Trait2	Trait3	Trait4	Trait5	Trait6	Trait7	Trait8	Trait9	Trait10	Trait11	Trait12	Trait13	Trait14	Trait15	Trait16	Trait17	Trait18	Trait19	Trait20	Trait21	Trait22	Trait23	Trait24	Trait25	Trait26	Trait27	Trait28	Trait29	Trait30	Trait31	Trait32	Trait33	Trait34	Trait35	Trait36	Trait37	Trait38	Trait39	Trait40	Trait41	Trait42	Trait43	Trait44	Trait45	Trait46	Trait47	Trait48
	Trait 1: LV_G_0106_F::A_51_P327451	n	0.081	-0.115	0.084	0.289	-0.097	0.216	-0.073	0.1	-0.219	0.06	0.024	-0.299	-0.172	-0.372	0.178	0.35	0.011	0.065	-0.282	0.153	-0.175	0.002	0.356	-0.011	-0.079	0.049	0.235	0.067	-0.154	0.045	0.092	0.076	0.397	-0.228	-0.143	-0.205	0.286	-0.558	0.288	0.093	-0.212	0.082	-0.03	-0.055	0.205	0.126	0.086
	Symbol: Alas2	42	42	42	42	42	42	42	42	42	42	42	42	42	42	42	42	42	42	42	42	42	42	42	42	42	42	42	42	42	42	42	42	42	42	42	42	42	42	42	42	42	42	42	42	42	42	42	42
	Alas2 on Chr X @ 147.004993 Mb
	aminolevulinic acid synthase 2, erythroid
	Trait 2: LV_G_0106_F::A_51_P236656	0.155	n	-0.074	-0.596	0.215	0.542	0.063	0.03	-0.24	-0.174	-0.016	-0.416	0.014	-0.086	-0.292	0.076	-0.222	0.088	-0.35	0.369	-0.226	-0.057	-0.428	0.583	-0.087	0.036	0.321	0.186	-0.203	-0.042	0.257	-0.066	-0.2	0.244	-0.28	0.203	0.021	-0.329	-0.095	0.253	-0.161	-0.324	-0.078	-0.328	0.067	0.127	-0.194	0.276
	Symbol: Apex2	42	42	42	42	42	42	42	42	42	42	42	42	42	42	42	42	42	42	42	42	42	42	42	42	42	42	42	42	42	42	42	42	42	42	42	42	42	42	42	42	42	42	42	42	42	42	42	42
	Apex2 on Chr X @ 147.006103 Mb
	apurinic/apyrimidinic endonuclease 2
	Trait 3: LV_G_0106_F::A_51_P419319	-0.039	-0.043	n	0.298	-0.086	0.283	0.113	0.126	-0.064	0.259	-0.335	0.195	-0.215	-0.118	0.177	-0.06	-0.025	0.19	-0.138	-0.03	0.052	0.098	-0.172	-0.26	-0.109	0.093	-0.05	-0.24	0.012	0.148	-0.009	0.027	0.077	-0.062	0.169	-0.196	0.249	-0.04	-0.014	0.167	-0.147	0.125	0.236	-0.055	0.157	0.289	0.133	-0.01
	Symbol: Aqp4	42	42	42	42	42	42	42	42	42	42	42	42	42	42	42	42	42	42	42	42	42	42	42	42	42	42	42	42	42	42	42	42	42	42	42	42	42	42	42	42	42	42	42	42	42	42	42	42
	Aqp4 on Chr 18 @ 15.551497 Mb
	aquaporin 4 (kidney basolateral resorption, astrocyte expressed, neuromyelitis optica)
	Trait 4: LV_G_0106_F::A_51_P448140	0.052	-0.456	0.245	n	-0.156	-0.261	0.251	0.087	0.012	0.373	-0.266	0.258	-0.01	0.089	0.435	-0.21	0.212	0.03	0.183	-0.162	0.173	-0.078	0.255	-0.325	0.01	0.009	-0.073	-0.086	0.188	0.001	-0.049	-0.215	0.067	-0.136	0.189	-0.244	0.242	0.208	-0.007	-0.048	0.099	0.157	0.371	0.288	-0.279	-0.133	0.079	-0.105
	Symbol: Cd22	42	42	42	42	42	42	42	42	42	42	42	42	42	42	42	42	42	42	42	42	42	42	42	42	42	42	42	42	42	42	42	42	42	42	42	42	42	42	42	42	42	42	42	42	42	42	42	42
	Cd22 on Chr 7 @ 31.65159 Mb
	CD22 antigen
	Trait 5: LV_G_0106_F::A_51_P172917	0.318	0.37	0.002	-0.125	n	-0.133	0.355	-0.503	0.021	-0.249	0.118	-0.265	0.062	-0.275	-0.311	0.44	0.316	-0.465	-0.241	-0.128	0.061	0.029	0.18	0.113	0.281	-0.255	-0.014	-0.025	0.429	-0.245	-0.175	0.114	-0.096	0.279	-0.274	-0.152	-0.339	-0.061	-0.496	-0.14	-0.121	0.107	-0.354	-0.418	-0.169	-0.136	-0.061	-0.116
	Symbol: Cmah	42	42	42	42	42	42	42	42	42	42	42	42	42	42	42	42	42	42	42	42	42	42	42	42	42	42	42	42	42	42	42	42	42	42	42	42	42	42	42	42	42	42	42	42	42	42	42	42
	Cmah on Chr 13 @ 24.556095 Mb
	cytidine monophospho-N-acetylneuraminic acid hydroxylase
	Trait 6: LV_G_0106_F::A_51_P279693	-0.107	0.484	0.274	-0.208	-0.043	n	0.02	0.162	-0.317	-0.059	-0.146	0.011	0.031	-0.148	-0.121	-0.112	-0.248	0.192	-0.355	0.274	-0.027	-0.087	-0.503	0.333	-0.249	0.058	0.093	0.05	-0.147	0.068	0.288	-0.046	-0.137	0.069	-0.065	0.07	0.261	-0.177	0.21	0.259	-0.027	-0.306	-0.012	-0.198	0.132	0.255	-0.199	0.423
	Symbol: Cyp1a1	42	42	42	42	42	42	42	42	42	42	42	42	42	42	42	42	42	42	42	42	42	42	42	42	42	42	42	42	42	42	42	42	42	42	42	42	42	42	42	42	42	42	42	42	42	42	42	42
	Cyp1a1 on Chr 9 @ 57.551535 Mb
	cytochrome P450, family 1, subfamily a, polypeptide 1 (aromatic compound inducible, lung cancer associated, human CYP1A1)
	distal 3' UTR
	Trait 7: LV_G_0106_F::A_51_P450140	0.227	-0.016	0.164	0.371	0.32	0.083	n	0.013	-0.038	-0.009	0.033	0.009	0.056	0.043	-0.084	0.338	0.304	-0.277	-0.172	-0.264	0.469	-0.188	-0.039	0.05	0.391	0.235	0.19	-0.036	0.354	-0.236	0.199	0.246	-0.119	0.061	-0.236	-0.312	-0.143	0.241	-0.263	-0.028	0.32	0.059	0.134	0.048	-0.11	0.076	0.432	-0.075
	Symbol: Cyp1a2	42	42	42	42	42	42	42	42	42	42	42	42	42	42	42	42	42	42	42	42	42	42	42	42	42	42	42	42	42	42	42	42	42	42	42	42	42	42	42	42	42	42	42	42	42	42	42	42
	Cyp1a2 on Chr 9 @ 57.528863 Mb
	cytochrome P450, family 1, subfamily a, polypeptide 2
	exon 2
	Trait 8: LV_G_0106_F::A_51_P289097	-0.021	-0.006	0.19	-0.025	-0.441	0.158	-0.002	n	-0.009	0.224	0.138	0.168	0.006	0.201	0.103	0.028	-0.207	0.148	0.276	0.078	0.133	-0.231	-0.374	-0.061	-0.339	0.528	0.079	-0.176	-0.128	0.208	0.35	0.049	-0.18	0.181	0.273	0.093	0.118	-0.215	0.323	0.3	0.078	-0.12	0.408	0.05	0.203	0.236	0.329	-0.047
	Symbol: Dcx	42	42	42	42	42	42	42	42	42	42	42	42	42	42	42	42	42	42	42	42	42	42	42	42	42	42	42	42	42	42	42	42	42	42	42	42	42	42	42	42	42	42	42	42	42	42	42	42
	Dcx on Chr X @ 140.298065 Mb
	doublecortin
	Trait 9: LV_G_0106_F::A_51_P384246	0.179	-0.344	-0.086	-0.017	0.025	-0.329	0.04	-0.041	n	0.186	0.104	-0.069	0.029	0.048	-0.062	-0.122	-0.143	-0.134	0.386	-0.163	-0.162	-0.124	-0.016	-0.144	0.002	-0.137	-0.266	0.195	-0.038	0.043	-0.302	0.121	-0.003	-0.114	-0.091	-0.087	-0.119	-0.008	-0.132	-0.359	-0.379	0.021	-0.01	0.133	-0.27	0.045	-0.123	-0.175
	Symbol: Dusp13	42	42	42	42	42	42	42	42	42	42	42	42	42	42	42	42	42	42	42	42	42	42	42	42	42	42	42	42	42	42	42	42	42	42	42	42	42	42	42	42	42	42	42	42	42	42	42	42
	Dusp13 on Chr 14 @ 22.559328 Mb
	dual specificity phosphatase 13
	Trait 10: LV_G_0106_F::A_51_P465331	-0.241	-0.182	0.258	0.352	-0.217	-0.054	0.029	0.193	0.121	n	-0.168	-0.035	-0.016	0.147	0.317	-0.085	-0.295	0.229	0.077	0.003	-0.045	-0.198	-0.221	0	-0.114	0.28	0.058	-0.093	-0.126	0.26	-0.113	-0.267	0.169	-0.059	0.004	0.14	0.386	-0.07	-0.088	-0.146	-0.287	-0.035	0.402	0.185	-0.198	-0.04	-0.056	-0.102
	Symbol: Fgf7	42	42	42	42	42	42	42	42	42	42	42	42	42	42	42	42	42	42	42	42	42	42	42	42	42	42	42	42	42	42	42	42	42	42	42	42	42	42	42	42	42	42	42	42	42	42	42	42
	Fgf7 on Chr 2 @ 125.915147 Mb
	fibroblast growth factor 7
	Trait 11: LV_G_0106_F::A_51_P432398	0.171	-0.061	-0.321	-0.227	0.082	-0.173	0.085	0.12	0.1	-0.241	n	0.247	-0.28	0.02	-0.434	0.339	0.239	-0.419	0.203	-0.282	0.262	-0.318	0.204	0.023	0.102	0.219	-0.072	-0.04	0.172	-0.012	0.131	0.258	-0.249	0.332	-0.094	0.096	-0.287	-0.075	0.105	0.003	0.195	-0.165	-0.303	-0.361	0.037	0.061	0.306	0.201
	Symbol: Fgfr2	42	42	42	42	42	42	42	42	42	42	42	42	42	42	42	42	42	42	42	42	42	42	42	42	42	42	42	42	42	42	42	42	42	42	42	42	42	42	42	42	42	42	42	42	42	42	42	42
	Fgfr2 on Chr 7 @ 137.307296 Mb
	fibroblast growth factor receptor 2
	Trait 12: LV_G_0106_F::A_51_P293715	-0.043	-0.309	0.191	0.192	-0.264	0.073	0.053	0.13	-0.094	-0.09	0.204	n	-0.297	-0.174	0.235	0.107	0.407	-0.084	-0.121	-0.382	0.363	-0.058	0.066	-0.146	-0.047	0.266	-0.32	-0.245	0.06	-0.028	-0.04	0.145	-0.001	-0.191	-0.08	-0.215	0.142	0.244	0.093	0.129	0.473	0.146	0.126	0.193	0.04	0.16	0.341	0.336
	Symbol: Fgfrl1	42	42	42	42	42	42	42	42	42	42	42	42	42	42	42	42	42	42	42	42	42	42	42	42	42	42	42	42	42	42	42	42	42	42	42	42	42	42	42	42	42	42	42	42	42	42	42	42
	Fgfrl1 on Chr 5 @ 109.135524 Mb
	fibroblast growth factor receptor-like 1
	Trait 13: LV_G_0106_F::A_51_P222773	-0.383	-0.034	-0.172	-0.02	0.065	0.115	-0.049	-0.072	-0.058	0.017	-0.253	-0.24	n	-0.188	0.175	-0.201	-0.171	-0.026	-0.246	0.259	-0.148	-0.032	0.01	-0.209	-0.046	-0.111	0.186	-0.151	-0.043	-0.195	-0.154	-0.124	-0.213	-0.267	0.156	0.05	-0.064	-0.076	0.28	-0.192	0.032	0.113	-0.031	0.052	-0.005	-0.159	-0.129	-0.317
	Symbol: Foxa2	42	42	42	42	42	42	42	42	42	42	42	42	42	42	42	42	42	42	42	42	42	42	42	42	42	42	42	42	42	42	42	42	42	42	42	42	42	42	42	42	42	42	42	42	42	42	42	42
	Foxa2 on Chr 2 @ 147.868698 Mb
	forkhead box A2
	Trait 14: LV_G_0106_F::A_51_P500984	-0.149	-0.072	-0.213	0.148	-0.259	-0.181	0.078	0.11	0.132	0.098	0.007	-0.244	-0.218	n	0.29	-0.264	-0.408	0.011	0.204	0.193	0.012	0.106	-0.008	-0.159	0.098	0.242	-0.008	0.187	-0.355	0.11	-0.016	-0.081	-0.067	-0.149	0.142	0.003	-0.078	0.024	0.292	0.098	-0.065	0.22	0.157	0.307	0.058	-0.119	0.093	-0.03
	Symbol: Gadd45b	42	42	42	42	42	42	42	42	42	42	42	42	42	42	42	42	42	42	42	42	42	42	42	42	42	42	42	42	42	42	42	42	42	42	42	42	42	42	42	42	42	42	42	42	42	42	42	42
	Gadd45b on Chr 10 @ 80.39489 Mb
	growth arrest and DNA-damage-inducible 45 beta
	Trait 15: LV_G_0106_F::A_51_P297609	-0.369	-0.258	0.214	0.447	-0.333	-0.137	-0.074	0.077	-0.062	0.337	-0.405	0.223	0.068	0.305	n	-0.3	-0.067	0.113	-0.086	0.173	-0.128	0.199	0.002	-0.349	0.1	0.106	-0.141	-0.202	-0.178	0.036	-0.203	-0.365	0.114	-0.508	0.135	-0.037	0.233	0.016	0.352	-0.164	0.169	0.438	0.227	0.363	0.022	-0.241	-0.072	0.03
	Symbol: Gja1	42	42	42	42	42	42	42	42	42	42	42	42	42	42	42	42	42	42	42	42	42	42	42	42	42	42	42	42	42	42	42	42	42	42	42	42	42	42	42	42	42	42	42	42	42	42	42	42
	Gja1 on Chr 10 @ 56.10773 Mb
	gap junction membrane channel protein alpha 1
	Trait 16: LV_G_0106_F::A_51_P267617	0.208	0.009	0.064	-0.251	0.418	-0.126	0.303	0.042	0.011	-0.104	0.352	0.105	-0.214	-0.241	-0.308	n	0.393	-0.329	-0.032	-0.336	0.311	-0.263	-0.062	0.03	0.2	0.272	0.041	-0.241	0.465	-0.07	0.193	0.465	0.077	0.19	-0.154	-0.198	-0.29	-0.07	-0.319	-0.067	0.335	-0.159	-0.256	-0.327	0.245	0.15	0.251	0.124
	Symbol: Gjb2	42	42	42	42	42	42	42	42	42	42	42	42	42	42	42	42	42	42	42	42	42	42	42	42	42	42	42	42	42	42	42	42	42	42	42	42	42	42	42	42	42	42	42	42	42	42	42	42
	Gjb2 on Chr 14 @ 57.718953 Mb
	gap junction membrane channel protein beta 2
	Trait 17: LV_G_0106_F::A_51_P290626	0.398	-0.09	-0.041	0.188	0.312	-0.256	0.333	-0.202	-0.122	-0.259	0.328	0.399	-0.115	-0.35	-0.052	0.372	n	-0.24	-0.008	-0.455	0.359	-0.054	0.265	-0.09	0.398	0.08	-0.089	-0.249	0.386	-0.252	-0.114	0.216	-0.007	0.008	-0.284	0.014	-0.018	0.242	-0.26	-0.008	0.508	0.167	-0.065	0.003	0.118	0.128	0.194	0.06
	Symbol: Gulo	42	42	42	42	42	42	42	42	42	42	42	42	42	42	42	42	42	42	42	42	42	42	42	42	42	42	42	42	42	42	42	42	42	42	42	42	42	42	42	42	42	42	42	42	42	42	42	42
	Gulo on Chr 14 @ 66.60583 Mb
	gulonolactone (L-) oxidase (ascorbic acid biosynthesis, non-functional in humans, scurvy)
	mid distal 3' UTR
	Trait 18: LV_G_0106_F::A_51_P130995	-0.03	-0.117	0.258	0.044	-0.484	0.111	-0.382	0.281	-0.283	0.249	-0.405	0.011	-0.049	-0.075	0.128	-0.29	-0.302	n	-0.084	0.112	-0.297	0.198	-0.339	0.17	-0.274	0.01	0.135	0.24	-0.299	0.294	0.151	-0.373	0.32	-0.044	0.065	0.28	0.234	-0.02	0.145	0.226	-0.081	-0.063	0.309	0.212	0.022	0.201	-0.206	-0.153
	Symbol: Gypa	42	42	42	42	42	42	42	42	42	42	42	42	42	42	42	42	42	42	42	42	42	42	42	42	42	42	42	42	42	42	42	42	42	42	42	42	42	42	42	42	42	42	42	42	42	42	42	42
	Gypa on Chr 8 @ 83.020646 Mb
	glycophorin A
	Trait 19: LV_G_0106_F::A_51_P263965	0.073	-0.468	-0.176	0.294	-0.284	-0.437	-0.088	0.192	0.372	0.07	0.147	-0.112	-0.298	0.23	0.005	-0.059	-0.069	-0.04	n	-0.106	0.078	-0.167	0.163	-0.105	0.013	-0.022	-0.075	0.343	0.14	-0.06	0.092	0.174	-0.081	0.123	0.217	0.146	0.098	-0.046	0.099	-0.044	-0.155	-0.168	0	0.069	0.035	0.127	0.055	-0.328
	Symbol: Hmox1	42	42	42	42	42	42	42	42	42	42	42	42	42	42	42	42	42	42	42	42	42	42	42	42	42	42	42	42	42	42	42	42	42	42	42	42	42	42	42	42	42	42	42	42	42	42	42	42
	Hmox1 on Chr 8 @ 77.624207 Mb
	heme oxygenase (decycling) 1
	Trait 20: LV_G_0106_F::A_51_P239673	-0.395	0.359	-0.042	-0.155	-0.108	0.242	-0.301	0.046	-0.186	0.034	-0.262	-0.389	0.255	0.191	0.234	-0.297	-0.487	0.032	-0.085	n	-0.363	0.057	-0.131	-0.092	-0.205	-0.025	0.142	0.078	-0.365	0.091	-0.059	-0.428	-0.067	0.019	0.269	0.334	0.137	-0.327	0.464	0.128	-0.27	-0.027	-0.015	-0.086	0.144	-0.283	-0.305	0.174
	Symbol: Hprt	42	42	42	42	42	42	42	42	42	42	42	42	42	42	42	42	42	42	42	42	42	42	42	42	42	42	42	42	42	42	42	42	42	42	42	42	42	42	42	42	42	42	42	42	42	42	42	42
	Hprt on Chr X @ 50.374757 Mb
	hypoxanthine guanine phosphoribosyl transferase
	Trait 21: LV_G_0106_F::A_51_P331507	0.145	-0.311	0.042	0.241	0.084	-0.029	0.528	0.079	-0.111	-0.04	0.253	0.36	-0.113	-0.001	-0.105	0.316	0.443	-0.215	0.063	-0.409	n	-0.394	-0.022	-0.179	0.044	0.247	0.01	-0.205	0.29	-0.146	0.117	0.324	-0.139	0.089	-0.089	-0.313	-0.081	0.187	0.047	-0.066	0.236	0.006	-0.064	-0.123	0.147	0.074	0.726	0.026
	Symbol: Idh2	42	42	42	42	42	42	42	42	42	42	42	42	42	42	42	42	42	42	42	42	42	42	42	42	42	42	42	42	42	42	42	42	42	42	42	42	42	42	42	42	42	42	42	42	42	42	42	42
	Idh2 on Chr 7 @ 87.242779 Mb
	Trait 22: LV_G_0106_F::A_51_P136870	-0.203	0.052	0.117	-0.001	0.024	-0.142	-0.194	-0.235	-0.137	-0.139	-0.268	-0.122	-0.092	0.239	0.226	-0.254	-0.062	0.178	-0.04	0.106	-0.357	n	0.201	-0.04	0.424	-0.254	0.111	0.097	-0.078	0.159	-0.199	-0.17	0.278	-0.233	-0.174	0.004	0.113	0.136	-0.027	-0.019	0.033	0.572	0.1	0.293	0.033	-0.222	-0.28	-0.258
	Symbol: Kap	42	42	42	42	42	42	42	42	42	42	42	42	42	42	42	42	42	42	42	42	42	42	42	42	42	42	42	42	42	42	42	42	42	42	42	42	42	42	42	42	42	42	42	42	42	42	42	42
	Kap on Chr 2 @ 59.65849 Mb
	kidney androgen regulated protein
	Trait 23: LV_G_0106_F::A_51_P417747	-0.111	-0.322	-0.205	0.272	0.097	-0.472	0.037	-0.336	-0.049	-0.198	0.278	0.058	-0.038	0.083	-0.019	-0.066	0.267	-0.296	0.305	-0.165	0.006	0.263	n	-0.143	0.384	-0.254	0.157	-0.027	0.043	-0.271	-0.264	-0.024	-0.001	-0.058	0.107	-0.183	-0.346	0.409	-0.073	-0.25	0.203	0.096	-0.288	-0.015	-0.137	-0.21	0.049	-0.193
	Symbol: Kap	42	42	42	42	42	42	42	42	42	42	42	42	42	42	42	42	42	42	42	42	42	42	42	42	42	42	42	42	42	42	42	42	42	42	42	42	42	42	42	42	42	42	42	42	42	42	42	42
	Kap on Chr 6 @ 133.799925 Mb
	kidney androgen regulated protein
	Trait 24: LV_G_0106_F::A_51_P146149	0.339	0.627	-0.25	-0.336	0.123	0.299	-0.025	0.054	-0.215	0.042	-0.011	-0.175	-0.186	-0.159	-0.375	-0.029	-0.082	0.113	-0.151	-0.079	-0.22	-0.072	-0.154	n	-0.053	-0.054	0.17	0.413	-0.12	-0.146	0.23	-0.095	0.082	0.261	-0.497	0.155	0.006	0.071	-0.459	0.248	-0.036	-0.422	0.08	0.062	-0.264	0.207	-0.175	0.076
	Symbol: Kdap	42	42	42	42	42	42	42	42	42	42	42	42	42	42	42	42	42	42	42	42	42	42	42	42	42	42	42	42	42	42	42	42	42	42	42	42	42	42	42	42	42	42	42	42	42	42	42	42
	Kdap on Chr 7 @ 51.84071 Mb
	kidney-derived aspartic protease-like protein
	Trait 25: LV_G_0106_F::A_51_P300986	-0.018	-0.044	-0.019	0.043	0.238	-0.227	0.326	-0.313	-0.034	-0.012	0.09	-0.102	-0.126	0.169	0.062	0.159	0.306	-0.285	0.07	-0.196	0.047	0.53	0.465	0.039	n	0.098	0.368	0.065	0.222	-0.32	-0.13	0.157	0.045	-0.165	-0.347	-0.029	-0.013	0.262	-0.187	-0.145	0.389	0.475	0.033	0.155	0.055	-0.075	-0.008	-0.044
	Symbol: Map3k5	42	42	42	42	42	42	42	42	42	42	42	42	42	42	42	42	42	42	42	42	42	42	42	42	42	42	42	42	42	42	42	42	42	42	42	42	42	42	42	42	42	42	42	42	42	42	42	42
	Map3k5
	mitogen activated protein kinase kinase kinase 5
	Trait 26: LV_G_0106_F::A_51_P190540	-0.007	-0.061	0.176	0.024	-0.285	0.008	0.224	0.479	-0.051	0.228	0.225	0.285	-0.137	0.124	0.197	0.313	0.108	-0.026	-0.024	-0.058	0.204	-0.214	-0.263	-0.031	0.078	n	0.15	-0.285	-0.029	-0.198	0.204	0.278	0.029	0.136	0.129	0.141	0.18	-0.093	0.097	0.386	0.39	0.047	0.36	0.117	0.176	0.104	0.404	0.215
	Symbol: Mapk9	42	42	42	42	42	42	42	42	42	42	42	42	42	42	42	42	42	42	42	42	42	42	42	42	42	42	42	42	42	42	42	42	42	42	42	42	42	42	42	42	42	42	42	42	42	42	42	42
	Mapk9 on Chr 11 @ 49.687377 Mb
	mitogen activated protein kinase 9
	Trait 27: LV_G_0106_F::A_51_P286814	-0.067	0.199	-0.035	0.004	-0.04	0.132	0.195	-0.005	-0.291	0.027	-0.081	-0.33	0.17	0.009	-0.074	0.013	-0.001	0.025	-0.149	0.177	0.015	0.119	0.129	0.16	0.373	0.119	n	0.053	-0.02	-0.165	0.24	0.036	-0.194	0.061	0.002	-0.028	0.064	0.174	-0.084	0.157	0.066	-0.177	0.202	-0.104	0.203	0.054	0.073	-0.013
	Symbol: Ncor2	42	42	42	42	42	42	42	42	42	42	42	42	42	42	42	42	42	42	42	42	42	42	42	42	42	42	42	42	42	42	42	42	42	42	42	42	42	42	42	42	42	42	42	42	42	42	42	42
	Ncor2 on Chr 5 @ 125.497573 Mb
	nuclear receptor co-repressor 2, exon 2
	Trait 28: LV_G_0106_F::A_51_P197718	0.314	0.163	-0.291	0.017	-0.057	0.078	-0.075	-0.121	0.209	-0.089	-0.111	-0.173	-0.177	0.187	-0.192	-0.273	-0.243	0.146	0.322	0.014	-0.182	0.057	-0.076	0.377	-0.058	-0.292	-0.044	n	-0.143	-0.285	0.092	-0.134	-0.172	0.104	-0.105	0.148	0.091	-0.131	-0.129	0.233	-0.157	-0.204	-0.026	0.069	-0.25	0.259	-0.294	-0.108
	Symbol: Nkx2-2	42	42	42	42	42	42	42	42	42	42	42	42	42	42	42	42	42	42	42	42	42	42	42	42	42	42	42	42	42	42	42	42	42	42	42	42	42	42	42	42	42	42	42	42	42	42	42	42
	Nkx2-2 on Chr 2 @ 147.009154 Mb
	NK2 transcription factor related, locus 2 (Drosophila)
	Trait 29: LV_G_0106_F::A_51_P368123	0.354	-0.071	0.045	0.183	0.427	-0.073	0.326	-0.191	0.039	-0.076	0.193	-0.054	-0.179	-0.342	-0.141	0.404	0.433	-0.223	0.149	-0.335	0.231	-0.116	-0.036	-0.032	0.199	-0.046	0.043	-0.063	n	-0.095	0.204	0.282	0.034	0.211	0.026	-0.138	-0.031	0.03	-0.2	-0.19	0.144	0.065	-0.06	-0.271	-0.022	0.021	0.226	-0.179
	Symbol: Nkx2-3	42	42	42	42	42	42	42	42	42	42	42	42	42	42	42	42	42	42	42	42	42	42	42	42	42	42	42	42	42	42	42	42	42	42	42	42	42	42	42	42	42	42	42	42	42	42	42	42
	Nkx2-3 on Chr 19 @ 43.689699 Mb
	NK2 transcription factor related, locus 3 (Drosophila)
	Trait 30: LV_G_0106_F::A_51_P353938	-0.14	-0.145	0.127	-0.04	-0.045	-0.048	-0.165	0.272	0.212	0.207	-0.004	-0.111	-0.121	0.155	-0.072	0.076	-0.258	0.227	0.088	0.029	-0.058	0.196	-0.208	-0.229	-0.218	-0.176	-0.161	-0.177	-0.006	n	0.035	-0.253	0.285	0.031	0.006	0.007	-0.021	0.013	0.239	-0.313	-0.278	-0.004	-0.015	-0.083	0.174	-0.216	-0.09	0.015
	Symbol: Nkx2-4	42	42	42	42	42	42	42	42	42	42	42	42	42	42	42	42	42	42	42	42	42	42	42	42	42	42	42	42	42	42	42	42	42	42	42	42	42	42	42	42	42	42	42	42	42	42	42	42
	Nkx2-4 on Chr 2 @ 146.909207 Mb
	NK2 transcription factor related, locus 4 (Drosophila)
	Trait 31: LV_G_0106_F::A_51_P173281	0.084	0.16	-0.005	0.027	-0.173	0.228	0.261	0.471	-0.257	-0.066	0.132	-0.011	-0.143	-0.039	-0.235	0.201	-0.102	0.09	0.084	-0.007	0.158	-0.294	-0.208	0.227	-0.13	0.254	0.265	-0.031	0.192	0.021	n	0.277	-0.192	0.302	0.192	-0.169	0.033	-0.08	-0.02	0.451	0.106	-0.395	0.057	-0.266	0.205	0.114	0.116	0.052
	Symbol: Nkx2-5	42	42	42	42	42	42	42	42	42	42	42	42	42	42	42	42	42	42	42	42	42	42	42	42	42	42	42	42	42	42	42	42	42	42	42	42	42	42	42	42	42	42	42	42	42	42	42	42
	Nkx2-5 on Chr 17 @ 26.975737 Mb
	NK2 transcription factor related, locus 5 (Drosophila)
	Trait 32: LV_G_0106_F::A_51_P149004	0.13	-0.048	0.139	-0.135	0.164	-0.006	0.272	-0.073	0.178	-0.24	0.096	0.113	-0.072	-0.204	-0.348	0.461	0.208	-0.356	0.069	-0.37	0.296	-0.258	-0.057	-0.114	0.04	0.21	0.004	-0.161	0.268	-0.113	0.283	n	-0.09	0.096	0.01	-0.426	-0.099	0.25	-0.237	0.091	0.259	-0.095	-0.125	-0.078	0.33	0.28	0.231	0.007
	Symbol: Nkx2-6	42	42	42	42	42	42	42	42	42	42	42	42	42	42	42	42	42	42	42	42	42	42	42	42	42	42	42	42	42	42	42	42	42	42	42	42	42	42	42	42	42	42	42	42	42	42	42	42
	Nkx2-6 on Chr 14 @ 69.7934 Mb
	NK2 transcription factor related, locus 6 (Drosophila)
	Trait 33: LV_G_0106_F::A_51_P517878	0.051	-0.281	0.136	-0.075	-0.05	-0.234	-0.109	-0.135	0.036	0.145	-0.167	-0.063	-0.134	-0.086	0.006	0.22	-0.123	0.418	0.03	-0.126	-0.049	0.164	-0.024	0.021	0.076	0.069	-0.105	-0.214	0.016	0.197	-0.184	-0.042	n	-0.027	-0.215	0.062	-0.034	0.123	-0.117	-0.234	0.063	0.182	0.139	0.295	-0.179	-0.309	-0.077	-0.019
	Symbol: Nkx2-9	42	42	42	42	42	42	42	42	42	42	42	42	42	42	42	42	42	42	42	42	42	42	42	42	42	42	42	42	42	42	42	42	42	42	42	42	42	42	42	42	42	42	42	42	42	42	42	42
	Nkx2-9 on Chr 12 @ 57.712386 Mb
	NK2 transcription factor related, locus 9 (Drosophila)
	Trait 34: LV_G_0106_F::A_51_P369311	0.406	0.21	-0.006	-0.057	0.18	0.023	0.081	0.36	-0.111	-0.032	0.317	-0.219	-0.198	-0.123	-0.387	0.146	-0.024	0.054	0.201	0.049	0.124	-0.273	-0.11	0.244	-0.156	0.191	-0.029	0.1	0.253	0.018	0.352	0.037	-0.004	n	0.242	0.016	-0.172	-0.134	-0.206	0.247	-0.133	-0.235	0.041	-0.563	-0.038	0.124	0.198	-0.018
	Symbol: Nox4	42	42	42	42	42	42	42	42	42	42	42	42	42	42	42	42	42	42	42	42	42	42	42	42	42	42	42	42	42	42	42	42	42	42	42	42	42	42	42	42	42	42	42	42	42	42	42	42
	Nox4 on Chr 7 @ 94.472458 Mb
	NADPH oxidase 4
	Trait 35: LV_G_0106_F::A_51_P121266	-0.243	-0.293	0.161	0.251	-0.264	-0.032	-0.13	0.243	-0.056	-0.025	-0.038	-0.107	0.193	0.162	0.151	-0.203	-0.33	0.075	0.216	0.301	-0.096	-0.121	0.131	-0.469	-0.286	0.112	0.021	-0.094	-0.057	0.03	0.155	-0.023	-0.214	0.322	n	-0.119	-0.02	-0.165	0.348	0.125	-0.079	-0.05	-0.025	-0.331	0.224	0.054	0.061	-0.121
	Symbol: Pex5l	42	42	42	42	42	42	42	42	42	42	42	42	42	42	42	42	42	42	42	42	42	42	42	42	42	42	42	42	42	42	42	42	42	42	42	42	42	42	42	42	42	42	42	42	42	42	42	42
	Pex5l on Chr 3 @ 32.849582 Mb
	peroxisomal biogenesis factor 5-like
	Trait 36: LV_G_0106_F::A_51_P353183	-0.094	0.142	-0.229	-0.227	-0.155	0.04	-0.319	0.111	-0.138	0.163	0.078	-0.195	0.067	-0.026	0.124	-0.132	-0.035	0.139	0.072	0.426	-0.327	0.011	-0.159	0.144	0.036	0.196	-0.015	0.034	-0.096	-0.188	-0.148	-0.411	0.075	0.022	-0.141	n	0.268	-0.401	0.174	0.199	-0.15	-0.083	0.141	0.111	-0.091	-0.048	-0.197	-0.034
	Symbol: Prdx1	42	42	42	42	42	42	42	42	42	42	42	42	42	42	42	42	42	42	42	42	42	42	42	42	42	42	42	42	42	42	42	42	42	42	42	42	42	42	42	42	42	42	42	42	42	42	42	42
	Prdx1 on Chr 16 @ 48.219068 Mb
	peroxiredoxin 1
	Trait 37: LV_G_0106_F::A_51_P209771	-0.164	-0.043	0.231	0.278	-0.302	0.18	-0.086	0.046	-0.095	0.294	-0.315	0.154	-0.123	-0.056	0.372	-0.191	0.006	0.21	0.183	0.115	-0.054	0.168	-0.322	-0.015	0.024	0.318	0.044	0.145	0.023	-0.09	0.017	-0.023	-0.019	-0.137	-0.108	0.335	n	-0.197	0.069	0.235	-0.073	0.049	0.38	0.275	0.083	0.09	-0.292	0.057
	Symbol: Prrx1	42	42	42	42	42	42	42	42	42	42	42	42	42	42	42	42	42	42	42	42	42	42	42	42	42	42	42	42	42	42	42	42	42	42	42	42	42	42	42	42	42	42	42	42	42	42	42	42
	Prrx1 on Chr 1 @ 165.178384 Mb
	paired related homeobox 1
	Trait 38: LV_G_0106_F::A_51_P262973	0.142	-0.253	-0.015	0.212	-0.02	-0.241	0.295	-0.246	-0.015	-0.039	-0.08	0.127	-0.037	0.01	-0.117	-0.08	0.266	-0.048	-0.01	-0.321	0.195	0.096	0.438	0.047	0.289	-0.146	0.172	-0.13	-0.051	-0.026	-0.024	0.246	0.068	-0.139	-0.074	-0.424	-0.26	n	-0.192	-0.173	0.372	0.056	0.002	0.344	0.135	0.002	0.234	-0.122
	Symbol: Prrx1	42	42	42	42	42	42	42	42	42	42	42	42	42	42	42	42	42	42	42	42	42	42	42	42	42	42	42	42	42	42	42	42	42	42	42	42	42	42	42	42	42	42	42	42	42	42	42	42
	Prrx1 on Chr 1 @ 165.183225 Mb
	paired related homeobox 1
	Trait 39: LV_G_0106_F::A_51_P305508	-0.547	-0.161	-0.179	-0.002	-0.521	0.207	-0.209	0.27	-0.184	-0.063	0.112	0.123	0.323	0.258	0.267	-0.354	-0.288	0.171	0.051	0.474	0.036	-0.012	0.012	-0.303	-0.26	0.021	0.031	-0.066	-0.396	0.194	0.024	-0.39	-0.154	-0.102	0.313	0.126	0.019	-0.124	n	-0.124	0.148	0.119	-0.129	-0.022	0.323	-0.118	0.091	0.095
	Symbol: Rerg	42	42	42	42	42	42	42	42	42	42	42	42	42	42	42	42	42	42	42	42	42	42	42	42	42	42	42	42	42	42	42	42	42	42	42	42	42	42	42	42	42	42	42	42	42	42	42	42
	Rerg on Chr 6 @ 137.00354 Mb
	RAS-like, estrogen-regulated, growth-inhibitor
	Trait 40: LV_G_0106_F::A_51_P232530	0.28	0.267	0.1	0.076	-0.094	0.229	0.095	0.323	-0.299	-0.211	0.046	0.172	-0.115	0.086	-0.096	-0.03	0.032	0.087	-0.126	0.039	0.046	-0.026	-0.178	0.217	-0.036	0.412	0.155	0.197	-0.171	-0.317	0.452	0.132	-0.299	0.189	0.028	0.093	0.215	-0.059	-0.029	n	0.113	-0.169	0.417	0.075	0.16	0.305	0.069	0.168
	Symbol: Shox2	42	42	42	42	42	42	42	42	42	42	42	42	42	42	42	42	42	42	42	42	42	42	42	42	42	42	42	42	42	42	42	42	42	42	42	42	42	42	42	42	42	42	42	42	42	42	42	42
	Shox2 on Chr 3 @ 66.777191 Mb
	short stature homeobox 2
	Trait 41: LV_G_0106_F::A_51_P140803	0.005	-0.08	-0.078	0.045	-0.153	0.006	0.37	0.027	-0.302	-0.297	0.248	0.469	0.019	0.016	0.147	0.336	0.474	-0.131	-0.174	-0.266	0.267	0.011	0.186	-0.05	0.313	0.374	0.109	-0.195	0.025	-0.301	0.151	0.249	0.002	-0.212	-0.15	-0.127	-0.061	0.33	0.191	0.227	n	0.135	-0.001	0.234	0.272	0.16	0.303	0.169
	Symbol: Slco1b2	42	42	42	42	42	42	42	42	42	42	42	42	42	42	42	42	42	42	42	42	42	42	42	42	42	42	42	42	42	42	42	42	42	42	42	42	42	42	42	42	42	42	42	42	42	42	42	42
	Slco1b2 on Chr 6 @ 141.634476 Mb
	solute carrier organic anion transporter family, member 1b2
	Trait 42: LV_G_0106_F::A_51_P425205	-0.134	-0.203	0.111	0.159	0.198	-0.268	0.021	-0.243	0.046	-0.018	-0.135	0.171	0.066	0.269	0.437	-0.083	0.14	-0.088	-0.118	-0.089	0.045	0.558	0.139	-0.385	0.508	0.027	-0.144	-0.098	0.042	0.048	-0.378	-0.107	0.002	-0.262	-0.053	-0.132	0.023	0.055	-0.033	-0.014	0.117	n	0.16	0.262	-0.007	-0.248	-0.028	-0.221
	Symbol: Sod1	42	42	42	42	42	42	42	42	42	42	42	42	42	42	42	42	42	42	42	42	42	42	42	42	42	42	42	42	42	42	42	42	42	42	42	42	42	42	42	42	42	42	42	42	42	42	42	42
	Sod1 on Chr 16 @ 90.223273 Mb
	superoxide dismutase 1, soluble
	Trait 43: LV_G_0106_F::A_51_P486046	0.088	-0.06	0.191	0.36	-0.284	-0.024	0.132	0.304	-0.003	0.336	-0.362	0.026	0.067	0.13	0.345	-0.272	-0.063	0.28	-0.068	-0.059	-0.064	0.152	-0.248	0.049	0.106	0.364	0.248	-0.032	-0.087	-0.076	0.05	-0.101	0.08	-0.048	-0.038	0.099	0.36	0.023	-0.072	0.43	0.043	0.163	n	0.5	-0.164	0.213	0.152	-0.02
	Symbol: Sod1	42	42	42	42	42	42	42	42	42	42	42	42	42	42	42	42	42	42	42	42	42	42	42	42	42	42	42	42	42	42	42	42	42	42	42	42	42	42	42	42	42	42	42	42	42	42	42	42
	Sod1 on Chr 16 @ 90.226479 Mb
	Mus musculus transcribed sequence with moderate similarity to protein pdb:1SOS (H.sapiens) J Chain J, Superoxide Dismutase (E.C.1.15.1.1) Mutant With Cys 6 Replaced By Ala And Cys 111 Replaced By Ser
	Trait 44: LV_G_0106_F::A_51_P367381	0	-0.214	-0.024	0.216	-0.414	-0.113	-0.018	0.058	0.143	0.171	-0.316	0.228	-0.004	0.186	0.299	-0.351	-0.027	0.284	0.08	-0.192	-0.141	0.239	-0.047	0.162	0.107	0.107	-0.114	0.196	-0.332	-0.063	-0.242	-0.067	0.218	-0.41	-0.355	0.107	0.309	0.319	0.025	0.21	0.254	0.157	0.594	n	-0.167	-0.042	-0.013	-0.156
	Symbol: Sod1	42	42	42	42	42	42	42	42	42	42	42	42	42	42	42	42	42	42	42	42	42	42	42	42	42	42	42	42	42	42	42	42	42	42	42	42	42	42	42	42	42	42	42	42	42	42	42	42
	Sod1 on Chr 16 @ 90.226497 Mb
	superoxide dismutase 1, soluble
	Trait 45: LV_G_0106_F::A_51_P493649	-0.097	0.048	0.132	-0.309	-0.175	0.103	-0.105	0.179	-0.184	-0.268	0.112	0.023	0.02	0.019	-0.104	0.26	0.126	-0.006	-0.054	0.186	0.106	-0.022	-0.101	-0.218	-0.051	0.192	0.259	-0.222	-0.11	0.138	0.238	0.335	-0.161	-0.067	0.141	-0.075	0.073	0.153	0.279	0.19	0.309	-0.089	-0.164	-0.174	n	0.324	0.135	-0.01
	Symbol: Ste	42	42	42	42	42	42	42	42	42	42	42	42	42	42	42	42	42	42	42	42	42	42	42	42	42	42	42	42	42	42	42	42	42	42	42	42	42	42	42	42	42	42	42	42	42	42	42	42
	Ste on Chr 5 @ 88.005187 Mb
	sulfotransferase, estrogen preferring
	Trait 46: LV_G_0106_F::A_51_P383228	0.218	-0.032	0.147	-0.095	-0.225	0.235	0.129	0.299	0.085	-0.008	0.12	0.174	-0.195	-0.072	-0.257	0.138	0.097	0.138	0.138	-0.321	0.134	-0.293	-0.122	0.115	-0.142	0.176	0.012	0.253	0.023	-0.169	0.088	0.234	-0.189	0.081	0.02	-0.073	0.033	-0.002	-0.026	0.169	0.164	-0.299	0.107	0.062	0.291	n	0.114	-0.042
	Symbol: Titf1	42	42	42	42	42	42	42	42	42	42	42	42	42	42	42	42	42	42	42	42	42	42	42	42	42	42	42	42	42	42	42	42	42	42	42	42	42	42	42	42	42	42	42	42	42	42	42	42
	Titf1 on Chr 12 @ 57.634028 Mb
	thyroid transcription factor 1
	Trait 47: LV_G_0106_F::A_51_P323291	0.088	-0.318	0.091	0.018	-0.124	-0.11	0.359	0.34	-0.001	-0.201	0.315	0.327	-0.033	0.042	-0.028	0.237	0.287	-0.134	-0.045	-0.301	0.641	-0.188	0.036	-0.255	0.048	0.325	0.126	-0.345	-0.012	-0.04	0.093	0.201	0.033	0.042	-0.02	-0.17	-0.221	0.222	0.184	0.237	0.391	-0.024	0.249	0.133	0.184	0.174	n	-0.087
	Symbol: Trim28	42	42	42	42	42	42	42	42	42	42	42	42	42	42	42	42	42	42	42	42	42	42	42	42	42	42	42	42	42	42	42	42	42	42	42	42	42	42	42	42	42	42	42	42	42	42	42	42
	Trim28 on Chr 7 @ 13.61481 Mb
	tripartite motif protein 28
	Trait 48: LV_G_0106_F::A_51_P152234	0.108	0.349	-0.008	-0.181	-0.064	0.415	-0.047	-0.108	-0.148	-0.157	0.141	0.306	-0.253	-0.053	0.027	0.129	0.038	-0.162	-0.456	0.199	-0.003	-0.237	-0.275	0.099	-0.229	0.147	-0.012	-0.067	-0.091	-0.166	0.075	-0.037	-0.116	-0.042	-0.127	0.04	0.004	-0.198	0.059	0.21	0.144	-0.188	-0.063	-0.164	0.031	-0.019	0.06	n
	Symbol: Trip4	42	42	42	42	42	42	42	42	42	42	42	42	42	42	42	42	42	42	42	42	42	42	42	42	42	42	42	42	42	42	42	42	42	42	42	42	42	42	42	42	42	42	42	42	42	42	42	42
	Trip4 on Chr 9 @ 65.6812 Mb
	thyroid hormone receptor interactor 4
	Trait 49: LV_G_0106_F::A_51_P491886	0.247	-0.059	0.156	0.422	0.156	-0.001	0.383	-0.028	-0.074	-0.206	0.066	-0.061	-0.172	0.214	-0.225	-0.131	0.061	-0.011	0.291	-0.096	0.297	-0.027	0.218	-0.191	0.005	-0.166	0.044	0.227	0.121	-0.038	0.266	0.128	-0.238	0.295	0.295	-0.363	-0.033	0.21	0.015	0.258	-0.039	0	-0.06	-0.222	0.093	0.189	0.036	-0.25
	Symbol: Trpc5	42	42	42	42	42	42	42	42	42	42	42	42	42	42	42	42	42	42	42	42	42	42	42	42	42	42	42	42	42	42	42	42	42	42	42	42	42	42	42	42	42	42	42	42	42	42	42	42
	Trpc5 on Chr X @ 140.816438 Mb
	transient receptor potential cation channel, subfamily C, member 5
	Trait 50: LV_G_0106_F::A_51_P207310	-0.169	-0.062	0.357	0.149	-0.299	0.324	0.107	0.301	-0.052	-0.078	-0.14	0.12	0.188	-0.065	0.171	0.092	-0.046	-0.003	-0.017	0.2	0.083	-0.211	-0.29	-0.44	-0.239	0.4	0.154	-0.132	0.009	0.002	0.301	0.336	-0.312	0.025	0.495	-0.13	0.305	-0.194	0.274	0.26	0.217	-0.1	0.094	-0.192	0.457	0.25	0.1	0.212
	Symbol: Txn2	42	42	42	42	42	42	42	42	42	42	42	42	42	42	42	42	42	42	42	42	42	42	42	42	42	42	42	42	42	42	42	42	42	42	42	42	42	42	42	42	42	42	42	42	42	42	42	42
	Txn2 on Chr 15 @ 77.745477 Mb
	thioredoxin 2
	Trait 51: LV_G_0106_F::A_51_P438805	0.003	-0.422	-0.111	0.261	-0.147	-0.351	0.019	0.073	0.181	-0.023	0.396	0.511	-0.421	0.255	0.114	0.071	0.256	-0.056	0.341	-0.408	0.245	0.133	0.302	-0.164	0.228	0.05	-0.284	0.122	0.116	0.139	0.1	0.04	-0.082	-0.106	-0.114	-0.18	-0.006	0.105	0.007	0.115	0.203	0.381	-0.059	0.231	-0.089	-0.056	0.137	-0.126
	Symbol: Txnip	42	42	42	42	42	42	42	42	42	42	42	42	42	42	42	42	42	42	42	42	42	42	42	42	42	42	42	42	42	42	42	42	42	42	42	42	42	42	42	42	42	42	42	42	42	42	42	42
	Txnip on Chr 3 @ 96.365147 Mb
	thioredoxin interacting protein
	Trait 52: LV_G_0106_F::A_51_P205385	-0.014	-0.223	-0.012	0.008	-0.125	-0.136	0.267	0.005	-0.017	-0.206	0.293	0.508	-0.276	0.087	0.234	0.365	0.422	-0.249	0.023	-0.202	0.343	-0.006	0.033	-0.218	0.292	0.418	-0.012	-0.319	0.128	-0.057	0.139	0.236	0.123	-0.234	-0.194	-0.033	0.195	0.2	0.09	0.068	0.668	0.176	-0.016	0.134	0.383	-0.025	0.377	0.189
	Symbol: Uox	42	42	42	42	42	42	42	42	42	42	42	42	42	42	42	42	42	42	42	42	42	42	42	42	42	42	42	42	42	42	42	42	42	42	42	42	42	42	42	42	42	42	42	42	42	42	42	42
	Uox on Chr 3 @ 146.294204 Mb
	urate oxidase
[truncated: 4 more columns]

## Sheet: Table S2
Supplementary Table S2. Gene correlations among altered, partners, and QTL genes of Gulo in Male mice
	Spearman Rank Correlation (rho)
P e a r s o n r		Trait1	Trait2	Trait3	Trait4	Trait5	Trait6	Trait7	Trait8	Trait9	Trait10	Trait11	Trait12	Trait13	Trait14	Trait15	Trait16	Trait17	Trait18	Trait19	Trait20	Trait21	Trait22	Trait23	Trait24	Trait25	Trait26	Trait27	Trait28	Trait29	Trait30	Trait31	Trait32	Trait33	Trait34	Trait35	Trait36	Trait37	Trait38	Trait39	Trait40	Trait41	Trait42	Trait43	Trait44	Trait45	Trait46	Trait47	Trait48
	Trait 1: LV_G_0106_M::A_51_P327451	n	0.215	0.12	0.274	0.394	-0.145	0.475	-0.057	0.195	0.005	-0.083	-0.093	-0.125	-0.543	-0.07	-0.05	0.285	-0.091	0.082	-0.138	0.01	0.014	0.318	0.404	-0.069	-0.012	0.202	-0.041	0.012	-0.237	0.072	0.371	-0.022	0.099	-0.282	-0.171	-0.015	0.304	-0.588	-0.12	-0.048	-0.088	-0.087	0.056	-0.202	-0.201	0.159	0.039
	Symbol: Alas2	41	41	41	41	41	41	41	41	41	41	41	41	41	41	41	41	41	41	41	41	41	41	41	41	41	41	41	41	41	41	41	41	41	41	41	41	41	41	41	41	41	41	41	41	41	41	41	41
	Alas2 on Chr X @ 147.004993 Mb
	aminolevulinic acid synthase 2, erythroid
	Trait 2: LV_G_0106_M::A_51_P236656	0.273	n	0.031	-0.031	0.126	0.148	0.022	0.079	-0.107	0.064	-0.129	-0.354	-0.086	-0.192	0.155	-0.113	-0.244	0.148	0.047	0.116	-0.507	0.311	-0.028	0.664	0.238	0.162	0.283	-0.14	0.053	0.196	0.359	-0.178	0.035	-0.227	-0.215	0.197	0.395	0.183	0.022	0.28	-0.046	-0.081	0.415	0.301	0.095	-0.142	0.026	-0.017
	Symbol: Apex2	41	41	41	41	41	41	41	41	41	41	41	41	41	41	41	41	41	41	41	41	41	41	41	41	41	41	41	41	41	41	41	41	41	41	41	41	41	41	41	41	41	41	41	41	41	41	41	41
	Apex2 on Chr X @ 147.006103 Mb
	apurinic/apyrimidinic endonuclease 2
	Trait 3: LV_G_0106_M::A_51_P419319	0.136	0.026	n	0.082	-0.01	0.074	0.107	-0.161	0.12	0.377	0.003	0.163	0.133	-0.256	0.184	-0.202	-0.156	0.195	0.004	0.119	0.244	0.004	-0.135	0.07	-0.034	0.071	-0.177	0.016	-0.053	0.201	-0.102	0.022	0.349	0.305	0.25	0.085	0.169	-0.002	-0.098	-0.126	0.093	0.158	0.31	0.426	-0.09	0.046	-0.131	0.238
	Symbol: Aqp4	41	41	41	41	41	41	41	41	41	41	41	41	41	41	41	41	41	41	41	41	41	41	41	41	41	41	41	41	41	41	41	41	41	41	41	41	41	41	41	41	41	41	41	41	41	41	41	41
	Aqp4 on Chr 18 @ 15.551497 Mb
	aquaporin 4 (kidney basolateral resorption, astrocyte expressed, neuromyelitis optica)
	Trait 4: LV_G_0106_M::A_51_P448140	0.21	-0.013	0.104	n	-0.015	-0.408	0.185	-0.062	0.137	0.229	-0.182	-0.08	-0.05	-0.451	0.071	-0.254	0.312	0.092	0.026	-0.359	-0.008	0.121	0.576	0.078	0.307	0.001	0.239	0.185	0.234	-0.137	0.096	0.058	-0.108	0.01	0.186	-0.602	0.235	0.047	-0.368	0.041	-0.073	0.024	0.087	0.197	-0.014	0.014	-0.149	-0.13
	Symbol: Cd22	41	41	41	41	41	41	41	41	41	41	41	41	41	41	41	41	41	41	41	41	41	41	41	41	41	41	41	41	41	41	41	41	41	41	41	41	41	41	41	41	41	41	41	41	41	41	41	41
	Cd22 on Chr 7 @ 31.65159 Mb
	CD22 antigen
	Trait 5: LV_G_0106_M::A_51_P172917	0.574	0.17	0.1	-0.033	n	-0.259	0.221	-0.332	0.146	-0.268	0.056	-0.241	0.026	-0.25	-0.119	0.144	0.109	-0.319	-0.153	-0.052	-0.145	0.331	0.041	0.037	0.218	0.142	0.28	0.067	0.019	-0.233	0.006	0.358	-0.124	0.123	-0.416	-0.103	-0.143	0.044	-0.352	-0.03	-0.103	0.287	0.021	0.005	-0.186	-0.082	0.301	-0.072
	Symbol: Cmah	41	41	41	41	41	41	41	41	41	41	41	41	41	41	41	41	41	41	41	41	41	41	41	41	41	41	41	41	41	41	41	41	41	41	41	41	41	41	41	41	41	41	41	41	41	41	41	41
	Cmah on Chr 13 @ 24.556095 Mb
	cytidine monophospho-N-acetylneuraminic acid hydroxylase
	Trait 6: LV_G_0106_M::A_51_P279693	-0.135	0.235	0.105	-0.357	-0.196	n	-0.045	0.307	-0.049	0.026	0.02	0.166	0.01	0.032	0.011	-0.345	-0.318	0.215	-0.169	0.225	-0.139	0.039	-0.314	0.115	-0.32	-0.003	-0.066	-0.234	-0.364	0.431	-0.079	-0.17	-0.027	-0.099	0.084	0.305	0.12	0.031	0.22	0.027	0.094	-0.054	-0.077	-0.164	-0.204	-0.161	-0.105	0.3
	Symbol: Cyp1a1	41	41	41	41	41	41	41	41	41	41	41	41	41	41	41	41	41	41	41	41	41	41	41	41	41	41	41	41	41	41	41	41	41	41	41	41	41	41	41	41	41	41	41	41	41	41	41	41
	Cyp1a1 on Chr 9 @ 57.551535 Mb
	cytochrome P450, family 1, subfamily a, polypeptide 1 (aromatic compound inducible, lung cancer associated, human CYP1A1)
	distal 3' UTR
	Trait 7: LV_G_0106_M::A_51_P450140	0.399	0.021	0.233	0.11	0.279	-0.16	n	-0.137	0.281	-0.127	0.22	0.158	-0.198	-0.246	0.019	-0.061	0.372	-0.047	0.018	-0.215	0.416	-0.179	0.223	0.395	-0.155	0.16	-0.119	0.248	-0.143	-0.184	0.057	0.001	0.115	0.282	-0.298	-0.123	0.005	0.209	-0.157	-0.025	0.093	-0.038	-0.158	0.229	-0.101	-0.062	0.332	0.113
	Symbol: Cyp1a2	41	41	41	41	41	41	41	41	41	41	41	41	41	41	41	41	41	41	41	41	41	41	41	41	41	41	41	41	41	41	41	41	41	41	41	41	41	41	41	41	41	41	41	41	41	41	41	41
	Cyp1a2 on Chr 9 @ 57.528863 Mb
	cytochrome P450, family 1, subfamily a, polypeptide 2
	exon 2
	Trait 8: LV_G_0106_M::A_51_P289097	0.005	0.069	-0.176	0	-0.273	0.337	-0.259	n	-0.221	-0.067	0.116	0.098	-0.166	0.09	-0.109	0.015	-0.015	0.167	0.113	0.02	-0.061	-0.035	-0.089	-0.022	-0.172	0.123	0.115	0.001	-0.162	0.142	0.298	-0.282	-0.198	-0.409	-0.098	0.197	0.202	-0.046	0.145	0.289	-0.009	-0.25	0.146	-0.16	-0.056	-0.044	0.094	0.116
	Symbol: Dcx	41	41	41	41	41	41	41	41	41	41	41	41	41	41	41	41	41	41	41	41	41	41	41	41	41	41	41	41	41	41	41	41	41	41	41	41	41	41	41	41	41	41	41	41	41	41	41	41
	Dcx on Chr X @ 140.298065 Mb
	doublecortin
	Trait 9: LV_G_0106_M::A_51_P384246	0.173	-0.112	0.145	0.169	0.135	-0.092	0.278	-0.197	n	0.228	0.015	-0.019	0.092	-0.161	0.257	0.011	0.25	-0.17	-0.07	-0.202	0.101	-0.171	-0.022	-0.045	-0.316	0.278	-0.019	0.218	-0.144	0.346	-0.435	0.154	0.027	-0.225	-0.024	-0.138	0.151	-0.211	-0.152	-0.086	-0.079	0.225	0.101	0.349	0.044	-0.055	-0.035	0.107
	Symbol: Dusp13	41	41	41	41	41	41	41	41	41	41	41	41	41	41	41	41	41	41	41	41	41	41	41	41	41	41	41	41	41	41	41	41	41	41	41	41	41	41	41	41	41	41	41	41	41	41	41	41
	Dusp13 on Chr 14 @ 22.559328 Mb
	dual specificity phosphatase 13
	Trait 10: LV_G_0106_M::A_51_P465331	-0.027	0.107	0.283	0.152	-0.249	0.111	-0.125	-0.086	0.279	n	-0.252	-0.078	0.261	-0.211	0.188	-0.15	-0.243	0.34	0.225	-0.14	0.088	-0.042	0.008	-0.078	-0.093	-0.025	-0.042	-0.09	-0.098	0.255	-0.213	-0.137	0.223	-0.232	0.337	0.016	0.338	-0.071	-0.014	-0.199	-0.089	-0.077	0.5	0.395	-0.05	0.1	-0.282	0.077
	Symbol: Fgf7	41	41	41	41	41	41	41	41	41	41	41	41	41	41	41	41	41	41	41	41	41	41	41	41	41	41	41	41	41	41	41	41	41	41	41	41	41	41	41	41	41	41	41	41	41	41	41	41
	Fgf7 on Chr 2 @ 125.915147 Mb
	fibroblast growth factor 7
	Trait 11: LV_G_0106_M::A_51_P432398	-0.049	-0.125	0.052	-0.153	0.005	-0.02	0.145	0.193	-0.022	-0.309	n	0.603	-0.293	0.135	-0.194	0.329	0.412	-0.401	-0.288	-0.319	0.43	-0.291	-0.168	0.217	0.003	0.474	-0.075	0.297	-0.091	-0.007	0.103	-0.031	0.191	0.249	-0.214	-0.01	-0.171	-0.221	0.003	0.014	0.477	0.069	-0.176	0.054	0.076	0.213	0.413	0.406
	Symbol: Fgfr2	41	41	41	41	41	41	41	41	41	41	41	41	41	41	41	41	41	41	41	41	41	41	41	41	41	41	41	41	41	41	41	41	41	41	41	41	41	41	41	41	41	41	41	41	41	41	41	41
	Fgfr2 on Chr 7 @ 137.307296 Mb
	fibroblast growth factor receptor 2
	Trait 12: LV_G_0106_M::A_51_P293715	-0.098	-0.369	0.224	-0.082	-0.196	0.168	0.186	0.042	0.022	-0.125	0.542	n	-0.214	0.097	-0.06	0.046	0.232	-0.272	-0.243	-0.206	0.559	-0.316	-0.211	-0.091	-0.207	0.301	-0.143	-0.082	-0.17	0.124	-0.161	0.056	0.34	0.259	-0.172	-0.044	-0.318	0.021	0.002	-0.261	0.651	0.104	-0.268	0.032	-0.106	0.235	0.184	0.635
	Symbol: Fgfrl1	41	41	41	41	41	41	41	41	41	41	41	41	41	41	41	41	41	41	41	41	41	41	41	41	41	41	41	41	41	41	41	41	41	41	41	41	41	41	41	41	41	41	41	41	41	41	41	41
	Fgfrl1 on Chr 5 @ 109.135524 Mb
	fibroblast growth factor receptor-like 1
	Trait 13: LV_G_0106_M::A_51_P222773	-0.022	-0.049	0.149	-0.031	0.176	0.052	-0.176	-0.18	0.063	0.305	-0.294	-0.227	n	-0.33	0.065	-0.359	-0.133	0.178	-0.144	0.281	-0.147	0.173	-0.078	-0.126	-0.293	-0.038	0.29	-0.279	0.014	0.005	-0.085	-0.044	0.058	-0.212	0.043	0.029	-0.044	-0.034	0.043	-0.166	-0.103	0.285	0.332	0.057	-0.169	-0.024	-0.206	0.038
	Symbol: Foxa2	41	41	41	41	41	41	41	41	41	41	41	41	41	41	41	41	41	41	41	41	41	41	41	41	41	41	41	41	41	41	41	41	41	41	41	41	41	41	41	41	41	41	41	41	41	41	41	41
	Foxa2 on Chr 2 @ 147.868698 Mb
	forkhead box A2
	Trait 14: LV_G_0106_M::A_51_P500984	-0.586	-0.1	-0.259	-0.407	-0.451	0.084	-0.238	0.114	-0.265	-0.156	0.057	-0.103	-0.312	n	0.106	0.497	-0.245	-0.122	0.247	0.158	0.074	-0.415	-0.262	-0.281	-0.063	-0.172	-0.372	0.173	-0.035	-0.052	-0.175	-0.002	-0.254	-0.054	0.119	0.306	-0.232	-0.017	0.542	0.24	-0.077	-0.231	-0.31	-0.301	0.465	0.282	0.01	0.016
	Symbol: Gadd45b	41	41	41	41	41	41	41	41	41	41	41	41	41	41	41	41	41	41	41	41	41	41	41	41	41	41	41	41	41	41	41	41	41	41	41	41	41	41	41	41	41	41	41	41	41	41	41	41
	Gadd45b on Chr 10 @ 80.39489 Mb
	growth arrest and DNA-damage-inducible 45 beta
	Trait 15: LV_G_0106_M::A_51_P297609	-0.204	-0.003	0.201	0.253	-0.198	0.058	-0.019	-0.13	0.264	0.229	-0.218	-0.02	0.039	0.096	n	-0.114	-0.147	0.491	0.002	0.166	-0.002	0.068	-0.066	0.065	-0.203	0.071	-0.127	0.014	-0.191	0.054	-0.278	-0.023	-0.15	0.008	0.038	0.123	0.389	-0.012	0.316	0.072	0.026	0.255	0.009	0.239	0.217	-0.17	-0.343	0.074
	Symbol: Gja1	41	41	41	41	41	41	41	41	41	41	41	41	41	41	41	41	41	41	41	41	41	41	41	41	41	41	41	41	41	41	41	41	41	41	41	41	41	41	41	41	41	41	41	41	41	41	41	41
	Gja1 on Chr 10 @ 56.10773 Mb
	gap junction membrane channel protein alpha 1
	Trait 16: LV_G_0106_M::A_51_P267617	-0.007	-0.055	-0.245	-0.183	0.017	-0.432	-0.112	0.031	-0.019	-0.131	0.239	-0.073	-0.365	0.423	-0.175	n	0.034	-0.466	0.425	-0.081	0.144	-0.272	0.038	-0.163	0.223	-0.039	-0.291	0.2	0.056	-0.185	0.174	0.216	-0.099	0.047	-0.077	0.24	-0.252	-0.191	-0.021	0.141	-0.138	-0.2	-0.11	-0.167	0.204	0.131	0.269	-0.048
	Symbol: Gjb2	41	41	41	41	41	41	41	41	41	41	41	41	41	41	41	41	41	41	41	41	41	41	41	41	41	41	41	41	41	41	41	41	41	41	41	41	41	41	41	41	41	41	41	41	41	41	41	41
	Gjb2 on Chr 14 @ 57.718953 Mb
	gap junction membrane channel protein beta 2
	Trait 17: LV_G_0106_M::A_51_P290626	0.291	-0.267	-0.054	0.366	0.092	-0.372	0.452	-0.048	0.244	-0.307	0.394	0.262	-0.162	-0.28	-0.109	-0.004	n	-0.268	-0.137	-0.655	0.383	-0.252	0.201	0.228	0.008	0.437	-0.025	0.295	0.103	-0.157	0.05	-0.055	0.177	0.123	-0.199	-0.344	-0.218	-0.011	-0.353	-0.101	0.132	0.071	-0.135	0.044	0.031	0.041	0.468	-0.165
	Symbol: Gulo	41	41	41	41	41	41	41	41	41	41	41	41	41	41	41	41	41	41	41	41	41	41	41	41	41	41	41	41	41	41	41	41	41	41	41	41	41	41	41	41	41	41	41	41	41	41	41	41
	Gulo on Chr 14 @ 66.60583 Mb
	gulonolactone (L-) oxidase (ascorbic acid biosynthesis, non-functional in humans, scurvy)
	mid distal 3' UTR
	Trait 18: LV_G_0106_M::A_51_P130995	-0.191	0.121	0.098	-0.031	-0.328	0.356	-0.183	0.223	-0.31	0.346	-0.384	-0.265	0.225	0.164	0.324	-0.371	-0.366	n	0.064	0.24	-0.072	0.108	0.004	-0.027	-0.2	-0.204	-0.037	-0.094	-0.284	0.184	-0.113	-0.324	0.023	-0.194	0.311	0.193	0.389	0.178	0.236	0.004	-0.168	-0.119	0.127	0.171	0.155	-0.187	-0.424	-0.16
	Symbol: Gypa	41	41	41	41	41	41	41	41	41	41	41	41	41	41	41	41	41	41	41	41	41	41	41	41	41	41	41	41	41	41	41	41	41	41	41	41	41	41	41	41	41	41	41	41	41	41	41	41
	Gypa on Chr 8 @ 83.020646 Mb
	glycophorin A
	Trait 19: LV_G_0106_M::A_51_P263965	-0.047	0.141	-0.084	-0.038	-0.214	-0.187	-0.068	0.098	-0.019	0.098	-0.318	-0.369	-0.226	0.434	-0.073	0.549	-0.153	0.073	n	-0.04	0.144	-0.28	0.18	-0.047	0.013	-0.251	-0.277	0.134	0.083	-0.172	0.135	-0.006	-0.137	-0.198	0.196	0.099	0.1	0.189	-0.062	0.145	-0.335	-0.575	0.063	-0.06	0.075	0.143	0.133	-0.379
	Symbol: Hmox1	41	41	41	41	41	41	41	41	41	41	41	41	41	41	41	41	41	41	41	41	41	41	41	41	41	41	41	41	41	41	41	41	41	41	41	41	41	41	41	41	41	41	41	41	41	41	41	41
	Hmox1 on Chr 8 @ 77.624207 Mb
	heme oxygenase (decycling) 1
	Trait 20: LV_G_0106_M::A_51_P239673	-0.114	0.169	0.107	-0.342	0.054	0.274	-0.18	0.009	-0.22	-0.053	-0.266	-0.271	0.302	0.172	0.147	-0.137	-0.603	0.334	-0.002	n	-0.228	0.179	-0.179	-0.169	-0.223	-0.382	-0.029	-0.387	0.046	0.024	-0.054	0.117	-0.228	0.054	0.024	0.506	-0.016	0.084	0.306	0.107	-0.169	0.048	0.044	-0.233	-0.066	-0.121	-0.217	0.157
	Symbol: Hprt	41	41	41	41	41	41	41	41	41	41	41	41	41	41	41	41	41	41	41	41	41	41	41	41	41	41	41	41	41	41	41	41	41	41	41	41	41	41	41	41	41	41	41	41	41	41	41	41
	Hprt on Chr X @ 50.374757 Mb
	hypoxanthine guanine phosphoribosyl transferase
	Trait 21: LV_G_0106_M::A_51_P331507	-0.042	-0.438	0.277	-0.08	-0.173	-0.205	0.434	-0.096	0.082	-0.077	0.399	0.585	-0.202	-0.042	-0.08	0.115	0.402	-0.23	0.055	-0.156	n	-0.526	-0.072	-0.034	-0.288	0.15	-0.402	0.26	-0.063	-0.144	-0.149	-0.069	0.328	0.315	-0.034	-0.034	-0.198	0.059	0.017	-0.149	0.271	-0.16	-0.125	0.126	0.037	0.138	0.4	0.143
	Symbol: Idh2	41	41	41	41	41	41	41	41	41	41	41	41	41	41	41	41	41	41	41	41	41	41	41	41	41	41	41	41	41	41	41	41	41	41	41	41	41	41	41	41	41	41	41	41	41	41	41	41
	Idh2 on Chr 7 @ 87.242779 Mb
	Trait 22: LV_G_0106_M::A_51_P136870	0.047	0.314	0.04	0.151	0.342	-0.011	-0.216	-0.089	-0.264	-0.04	-0.221	-0.275	0.22	-0.324	0.105	-0.253	-0.219	0.141	-0.285	0.082	-0.438	n	0.065	0.009	0.434	-0.006	0.429	-0.372	0.088	0.084	0.147	-0.043	-0.059	0.093	-0.1	-0.061	0.322	-0.1	-0.119	0.085	-0.152	0.593	0.391	0.115	-0.412	-0.425	-0.084	-0.194
	Symbol: Kap	41	41	41	41	41	41	41	41	41	41	41	41	41	41	41	41	41	41	41	41	41	41	41	41	41	41	41	41	41	41	41	41	41	41	41	41	41	41	41	41	41	41	41	41	41	41	41	41
	Kap on Chr 2 @ 59.65849 Mb
	kidney androgen regulated protein
	Trait 23: LV_G_0106_M::A_51_P417747	0.11	-0.084	-0.218	0.408	-0.132	-0.2	0.187	-0.008	-0.179	-0.083	-0.27	-0.089	-0.012	0.139	0.001	0.041	0.153	0.097	0.202	-0.163	-0.082	-0.035	n	0.145	0.251	-0.303	0.184	-0.016	0.106	-0.427	0.212	0.011	-0.341	0.139	-0.021	-0.205	-0.133	-0.01	-0.438	-0.194	-0.139	-0.111	-0.22	-0.02	-0.089	-0.144	-0.022	-0.143
	Symbol: Kap	41	41	41	41	41	41	41	41	41	41	41	41	41	41	41	41	41	41	41	41	41	41	41	41	41	41	41	41	41	41	41	41	41	41	41	41	41	41	41	41	41	41	41	41	41	41	41	41
	Kap on Chr 6 @ 133.799925 Mb
	kidney androgen regulated protein
	Trait 24: LV_G_0106_M::A_51_P146149	0.44	0.752	0.036	0.118	0.174	0.134	0.365	-0.026	-0.079	-0.113	0.097	-0.109	-0.113	-0.218	-0.102	-0.122	0.156	-0.122	0.007	-0.045	-0.057	0.129	0.208	n	0.065	0.116	0.125	0.089	0.126	-0.073	0.405	-0.192	0.074	0.129	-0.306	-0.066	0.244	0.324	-0.124	0.234	0.173	-0.117	0.103	0.274	0.076	-0.174	0.28	0.082
	Symbol: Kdap	41	41	41	41	41	41	41	41	41	41	41	41	41	41	41	41	41	41	41	41	41	41	41	41	41	41	41	41	41	41	41	41	41	41	41	41	41	41	41	41	41	41	41	41	41	41	41	41
	Kdap on Chr 7 @ 51.84071 Mb
	kidney-derived aspartic protease-like protein
	Trait 25: LV_G_0106_M::A_51_P300986	-0.004	0.245	-0.047	0.34	0.152	-0.388	-0.031	-0.159	-0.331	-0.086	-0.029	-0.272	-0.201	-0.097	-0.141	0.144	0.13	-0.148	0.04	-0.364	-0.269	0.542	0.115	0.149	n	0.032	0.21	0.052	0.337	-0.252	0.34	0.096	0.035	0.13	0.019	-0.204	0.121	-0.123	-0.225	0.14	0.047	0.156	0.22	0.186	0.008	0.035	0.01	-0.309
	Symbol: Map3k5	41	41	41	41	41	41	41	41	41	41	41	41	41	41	41	41	41	41	41	41	41	41	41	41	41	41	41	41	41	41	41	41	41	41	41	41	41	41	41	41	41	41	41	41	41	41	41	41
	Map3k5
	mitogen activated protein kinase kinase kinase 5
	Trait 26: LV_G_0106_M::A_51_P190540	0.037	0.096	0.129	0.05	0.201	-0.094	0.193	0.047	0.284	-0.108	0.514	0.324	-0.077	-0.234	0.078	-0.044	0.414	-0.329	-0.326	-0.274	0.124	0.102	-0.415	0.039	0.118	n	0.132	0.169	-0.17	0.207	-0.011	-0.213	0.308	-0.169	-0.249	0.065	0.03	-0.42	0.004	-0.071	0.186	0.318	0.296	0.332	0.002	0.084	0.224	0.198
	Symbol: Mapk9	41	41	41	41	41	41	41	41	41	41	41	41	41	41	41	41	41	41	41	41	41	41	41	41	41	41	41	41	41	41	41	41	41	41	41	41	41	41	41	41	41	41	41	41	41	41	41	41
	Mapk9 on Chr 11 @ 49.687377 Mb
	mitogen activated protein kinase 9
	Trait 27: LV_G_0106_M::A_51_P286814	0.285	0.237	-0.123	0.174	0.341	-0.119	-0.051	0.119	-0.12	-0.022	-0.043	-0.183	0.3	-0.365	-0.185	-0.31	0.023	0.033	-0.331	-0.041	-0.307	0.441	0.055	0.141	0.354	0.137	n	0.008	0.131	-0.179	0.041	-0.007	0.038	-0.266	-0.291	-0.257	0.04	0.029	-0.198	-0.112	0.212	0.227	0.233	0.141	-0.055	-0.067	-0.148	0.115
	Symbol: Ncor2	41	41	41	41	41	41	41	41	41	41	41	41	41	41	41	41	41	41	41	41	41	41	41	41	41	41	41	41	41	41	41	41	41	41	41	41	41	41	41	41	41	41	41	41	41	41	41	41
	Ncor2 on Chr 5 @ 125.497573 Mb
	nuclear receptor co-repressor 2, exon 2
	Trait 28: LV_G_0106_M::A_51_P197718	-0.057	-0.145	-0.043	0.158	-0.055	-0.182	0.135	0.002	0.186	-0.134	0.334	0.011	-0.316	0.081	-0.067	0.132	0.272	-0.245	0.1	-0.43	0.118	-0.265	-0.063	-0.015	0.12	0.177	0.064	n	0.086	-0.181	-0.012	0.034	-0.016	-0.031	0.099	-0.357	0.165	-0.105	0.166	0.289	0.017	-0.168	-0.154	0.048	0.452	0.356	0.036	-0.144
	Symbol: Nkx2-2	41	41	41	41	41	41	41	41	41	41	41	41	41	41	41	41	41	41	41	41	41	41	41	41	41	41	41	41	41	41	41	41	41	41	41	41	41	41	41	41	41	41	41	41	41	41	41	41
	Nkx2-2 on Chr 2 @ 147.009154 Mb
	NK2 transcription factor related, locus 2 (Drosophila)
	Trait 29: LV_G_0106_M::A_51_P368123	0.039	0.128	0.003	0.186	-0.017	-0.303	-0.132	-0.187	-0.178	-0.055	-0.042	-0.214	0.021	-0.032	-0.171	0.084	0.099	-0.242	0.153	0.06	0	0.136	0.028	0.176	0.353	-0.103	0.111	0.02	n	-0.25	0.282	0.235	0.112	0.186	0.017	-0.282	0.053	-0.136	-0.051	0.285	-0.076	-0.051	0.253	0.063	-0.057	0.307	0.092	-0.3
	Symbol: Nkx2-3	41	41	41	41	41	41	41	41	41	41	41	41	41	41	41	41	41	41	41	41	41	41	41	41	41	41	41	41	41	41	41	41	41	41	41	41	41	41	41	41	41	41	41	41	41	41	41	41
	Nkx2-3 on Chr 19 @ 43.689699 Mb
	NK2 transcription factor related, locus 3 (Drosophila)
	Trait 30: LV_G_0106_M::A_51_P353938	-0.071	0.112	0.087	-0.087	-0.172	0.4	-0.082	0.099	0.521	0.198	0.033	0.214	-0.042	-0.016	0.023	-0.021	-0.068	0.013	-0.065	-0.039	-0.122	-0.175	-0.224	-0.045	-0.39	0.161	-0.322	-0.228	-0.345	n	-0.123	-0.202	0.224	-0.314	0.267	0.175	0.216	-0.116	0.126	0.165	-0.176	0.053	0.289	0.167	0.025	-0.053	-0.091	0.109
	Symbol: Nkx2-4	41	41	41	41	41	41	41	41	41	41	41	41	41	41	41	41	41	41	41	41	41	41	41	41	41	41	41	41	41	41	41	41	41	41	41	41	41	41	41	41	41	41	41	41	41	41	41	41
	Nkx2-4 on Chr 2 @ 146.909207 Mb
	NK2 transcription factor related, locus 4 (Drosophila)
	Trait 31: LV_G_0106_M::A_51_P173281	0.106	0.407	-0.115	0.141	0.052	-0.027	0.001	0.285	-0.394	-0.253	0.139	-0.181	-0.073	-0.063	-0.314	0.169	0.052	-0.076	0.141	-0.097	-0.182	0.205	0.196	0.459	0.41	-0.02	0.077	-0.067	0.25	-0.121	n	-0.156	-0.072	0.139	-0.01	-0.023	0.063	-0.081	-0.013	0.32	-0.063	-0.253	0.22	-0.021	-0.104	0.087	0.221	-0.131
	Symbol: Nkx2-5	41	41	41	41	41	41	41	41	41	41	41	41	41	41	41	41	41	41	41	41	41	41	41	41	41	41	41	41	41	41	41	41	41	41	41	41	41	41	41	41	41	41	41	41	41	41	41	41
	Nkx2-5 on Chr 17 @ 26.975737 Mb
	NK2 transcription factor related, locus 5 (Drosophila)
	Trait 32: LV_G_0106_M::A_51_P149004	0.414	-0.134	0.02	0.089	0.408	-0.205	-0.045	-0.21	0.171	-0.096	-0.075	-0.108	0.055	-0.153	-0.037	0.26	0.025	-0.323	0.099	0.068	-0.151	-0.075	-0.012	-0.145	-0.014	-0.103	-0.001	0.039	0.238	-0.053	-0.09	n	-0.251	0.056	-0.052	-0.237	-0.194	0.105	-0.148	0.153	-0.01	0.1	-0.297	-0.105	-0.021	0.3	-0.026	0.119
	Symbol: Nkx2-6	41	41	41	41	41	41	41	41	41	41	41	41	41	41	41	41	41	41	41	41	41	41	41	41	41	41	41	41	41	41	41	41	41	41	41	41	41	41	41	41	41	41	41	41	41	41	41	41
	Nkx2-6 on Chr 14 @ 69.7934 Mb
	NK2 transcription factor related, locus 6 (Drosophila)
	Trait 33: LV_G_0106_M::A_51_P517878	0.043	-0.078	0.155	-0.375	-0.018	-0.078	0.156	-0.327	-0.053	-0.106	0.148	0.305	-0.006	-0.036	-0.271	-0.016	0.129	-0.192	-0.066	-0.071	0.465	-0.129	-0.273	-0.013	0.038	0.085	0.065	-0.047	0.214	-0.055	-0.124	-0.062	n	0.168	-0.063	0.04	-0.011	-0.059	-0.003	-0.371	0.329	0.029	0.341	0.499	-0.092	0.008	-0.008	0.095
	Symbol: Nkx2-9	41	41	41	41	41	41	41	41	41	41	41	41	41	41	41	41	41	41	41	41	41	41	41	41	41	41	41	41	41	41	41	41	41	41	41	41	41	41	41	41	41	41	41	41	41	41	41	41
	Nkx2-9 on Chr 12 @ 57.712386 Mb
	NK2 transcription factor related, locus 9 (Drosophila)
	Trait 34: LV_G_0106_M::A_51_P369311	0.106	-0.223	0.2	0.026	0.063	-0.217	0.359	-0.377	-0.29	-0.318	0.269	0.272	-0.257	-0.007	-0.038	0.091	0.227	-0.225	-0.207	0.024	0.383	0.004	0.206	0.124	0.152	-0.104	-0.214	-0.034	0.243	-0.308	0.16	0.012	0.279	n	0.012	-0.035	-0.161	-0.044	-0.114	-0.252	0.243	0.225	-0.269	-0.075	-0.291	-0.101	0.186	0.112
	Symbol: Nox4	41	41	41	41	41	41	41	41	41	41	41	41	41	41	41	41	41	41	41	41	41	41	41	41	41	41	41	41	41	41	41	41	41	41	41	41	41	41	41	41	41	41	41	41	41	41	41	41
	Nox4 on Chr 7 @ 94.472458 Mb
	NADPH oxidase 4
	Trait 35: LV_G_0106_M::A_51_P121266	-0.469	-0.237	0.133	0.049	-0.488	0.204	-0.34	-0.046	-0.133	0.236	-0.086	-0.086	-0.089	0.4	0.164	-0.061	-0.205	0.446	0.157	-0.03	-0.087	-0.118	-0.024	-0.388	0.047	-0.288	-0.301	0.136	0.016	0.156	0.021	-0.096	-0.017	0.072	n	-0.185	0.127	-0.212	0.079	0.053	-0.327	-0.226	0.062	-0.119	0.107	0.182	-0.327	-0.337
	Symbol: Pex5l	41	41	41	41	41	41	41	41	41	41	41	41	41	41	41	41	41	41	41	41	41	41	41	41	41	41	41	41	41	41	41	41	41	41	41	41	41	41	41	41	41	41	41	41	41	41	41	41
	Pex5l on Chr 3 @ 32.849582 Mb
	peroxisomal biogenesis factor 5-like
	Trait 36: LV_G_0106_M::A_51_P353183	-0.136	0.278	0.057	-0.542	-0.029	0.218	-0.014	0.167	-0.089	0.151	-0.093	-0.202	0.055	0.337	0.097	0.182	-0.463	0.282	0.183	0.596	0.016	-0.077	-0.231	0.001	-0.31	0.048	-0.214	-0.427	-0.194	0.138	-0.07	-0.282	0.032	-0.097	-0.165	n	-0.039	-0.104	0.198	-0.023	-0.197	0.009	0.145	0.002	-0.036	-0.269	0.096	0.201
	Symbol: Prdx1	41	41	41	41	41	41	41	41	41	41	41	41	41	41	41	41	41	41	41	41	41	41	41	41	41	41	41	41	41	41	41	41	41	41	41	41	41	41	41	41	41	41	41	41	41	41	41	41
	Prdx1 on Chr 16 @ 48.219068 Mb
	peroxiredoxin 1
	Trait 37: LV_G_0106_M::A_51_P209771	-0.029	0.364	0.136	0.256	-0.147	-0.019	-0.16	0.083	-0.021	0.302	-0.243	-0.301	-0.01	-0.211	0.334	-0.2	-0.233	0.278	0.136	-0.026	-0.135	0.46	-0.01	0.213	0.29	-0.098	0.15	0.131	0.196	-0.223	0.132	-0.228	-0.062	-0.139	0.053	-0.033	n	-0.018	0.086	0.444	-0.089	0.11	0.442	0.376	-0.052	-0.212	-0.18	-0.214
	Symbol: Prrx1	41	41	41	41	41	41	41	41	41	41	41	41	41	41	41	41	41	41	41	41	41	41	41	41	41	41	41	41	41	41	41	41	41	41	41	41	41	41	41	41	41	41	41	41	41	41	41	41
	Prrx1 on Chr 1 @ 165.178384 Mb
	paired related homeobox 1
	Trait 38: LV_G_0106_M::A_51_P262973	0.297	0.229	-0.092	0.01	0.11	0.102	0.171	-0.099	-0.171	-0.027	-0.258	-0.038	0.02	-0.119	-0.082	-0.128	0.002	0.117	0.173	0.11	0.027	-0.053	0.144	0.314	-0.077	-0.402	0.076	-0.191	-0.106	-0.115	-0.118	0.115	0.058	-0.076	-0.256	-0.063	-0.008	n	-0.091	0.132	0.169	-0.245	-0.201	-0.062	0.152	-0.094	0.183	0.009
	Symbol: Prrx1	41	41	41	41	41	41	41	41	41	41	41	41	41	41	41	41	41	41	41	41	41	41	41	41	41	41	41	41	41	41	41	41	41	41	41	41	41	41	41	41	41	41	41	41	41	41	41	41
	Prrx1 on Chr 1 @ 165.183225 Mb
	paired related homeobox 1
	Trait 39: LV_G_0106_M::A_51_P305508	-0.585	-0.08	-0.035	-0.272	-0.388	0.244	-0.102	0.116	-0.196	-0.042	0.018	-0.028	0.009	0.466	0.242	-0.13	-0.312	0.229	0.055	0.313	0.06	-0.141	-0.247	-0.215	-0.203	-0.007	-0.188	0.189	-0.045	-0.112	-0.054	-0.154	-0.035	-0.145	0.26	0.224	-0.04	-0.155	n	0.246	0.012	-0.079	0.053	-0.051	0.457	0.3	-0.329	0.127
	Symbol: Rerg	41	41	41	41	41	41	41	41	41	41	41	41	41	41	41	41	41	41	41	41	41	41	41	41	41	41	41	41	41	41	41	41	41	41	41	41	41	41	41	41	41	41	41	41	41	41	41	41
	Rerg on Chr 6 @ 137.00354 Mb
	RAS-like, estrogen-regulated, growth-inhibitor
	Trait 40: LV_G_0106_M::A_51_P232530	-0.077	0.276	-0.157	0.109	-0.056	0.019	-0.166	0.279	-0.196	-0.37	0.058	-0.261	-0.188	0.157	-0.037	0.152	-0.057	-0.053	0.255	0.146	-0.115	0.091	-0.02	0.284	0.108	-0.105	-0.133	0.225	0.281	-0.068	0.388	0.143	-0.265	-0.182	0.017	-0.057	0.308	0.14	0.174	n	-0.361	-0.045	0.148	-0.04	0.3	0.104	0.224	-0.284
	Symbol: Shox2	41	41	41	41	41	41	41	41	41	41	41	41	41	41	41	41	41	41	41	41	41	41	41	41	41	41	41	41	41	41	41	41	41	41	41	41	41	41	41	41	41	41	41	41	41	41	41	41
	Shox2 on Chr 3 @ 66.777191 Mb
	short stature homeobox 2
	Trait 41: LV_G_0106_M::A_51_P140803	0.013	-0.069	0.209	-0.105	-0.093	0.088	0.171	-0.019	0	-0.006	0.46	0.649	-0.079	-0.232	0.006	-0.115	0.174	-0.258	-0.374	-0.205	0.316	-0.144	-0.141	0.08	0.039	0.235	0.218	0.067	-0.113	-0.073	-0.068	-0.098	0.354	0.222	-0.247	-0.21	-0.066	0.11	-0.033	-0.375	n	0.114	-0.175	0.184	-0.021	0.21	0.017	0.515
	Symbol: Slco1b2	41	41	41	41	41	41	41	41	41	41	41	41	41	41	41	41	41	41	41	41	41	41	41	41	41	41	41	41	41	41	41	41	41	41	41	41	41	41	41	41	41	41	41	41	41	41	41	41
	Slco1b2 on Chr 6 @ 141.634476 Mb
	solute carrier organic anion transporter family, member 1b2
	Trait 42: LV_G_0106_M::A_51_P425205	0.016	-0.161	0.211	0.16	0.304	-0.122	0.042	-0.263	0.214	-0.133	0.045	0.108	0.256	-0.312	0.36	-0.223	0.121	-0.185	-0.552	0.006	-0.1	0.575	-0.144	-0.14	0.153	0.428	0.203	-0.069	-0.066	-0.005	-0.275	0.049	-0.053	0.106	-0.256	-0.098	0.085	-0.214	-0.107	-0.059	0.07	n	0.189	0.257	-0.255	-0.254	0.028	0.176
	Symbol: Sod1	41	41	41	41	41	41	41	41	41	41	41	41	41	41	41	41	41	41	41	41	41	41	41	41	41	41	41	41	41	41	41	41	41	41	41	41	41	41	41	41	41	41	41	41	41	41	41	41
	Sod1 on Chr 16 @ 90.223273 Mb
	superoxide dismutase 1, soluble
	Trait 43: LV_G_0106_M::A_51_P486046	-0.051	0.359	0.371	0.02	0.035	-0.05	-0.11	0.101	0.129	0.357	0.028	-0.27	0.283	-0.208	-0.015	-0.049	-0.141	0.005	0.01	0.148	-0.062	0.354	-0.461	0.098	0.299	0.312	0.252	-0.093	0.357	0.035	0.217	-0.126	0.101	-0.238	-0.019	0.256	0.365	-0.245	0.063	0.152	-0.027	0.197	n	0.519	-0.122	-0.016	0.046	-0.124
	Symbol: Sod1	41	41	41	41	41	41	41	41	41	41	41	41	41	41	41	41	41	41	41	41	41	41	41	41	41	41	41	41	41	41	41	41	41	41	41	41	41	41	41	41	41	41	41	41	41	41	41	41
	Sod1 on Chr 16 @ 90.226479 Mb
	Mus musculus transcribed sequence with moderate similarity to protein pdb:1SOS (H.sapiens) J Chain J, Superoxide Dismutase (E.C.1.15.1.1) Mutant With Cys 6 Replaced By Ala And Cys 111 Replaced By Ser
	Trait 44: LV_G_0106_M::A_51_P367381	0.07	0.231	0.541	0.254	0.071	-0.16	0.286	-0.132	0.313	0.355	0.074	0.011	0.081	-0.375	0.205	-0.183	0.068	-0.053	-0.04	-0.176	0.179	0.233	-0.223	0.19	0.338	0.333	0.211	0.034	0.125	-0.044	0.036	-0.101	0.106	-0.114	-0.112	0	0.467	-0.055	-0.139	-0.001	0.255	0.28	0.632	n	-0.039	-0.121	-0.039	0.151
	Symbol: Sod1	41	41	41	41	41	41	41	41	41	41	41	41	41	41	41	41	41	41	41	41	41	41	41	41	41	41	41	41	41	41	41	41	41	41	41	41	41	41	41	41	41	41	41	41	41	41	41	41
	Sod1 on Chr 16 @ 90.226497 Mb
	superoxide dismutase 1, soluble
	Trait 45: LV_G_0106_M::A_51_P493649	-0.166	0.083	0.071	0.077	-0.257	-0.261	-0.051	-0.113	0.199	0.107	-0.081	-0.345	-0.085	0.392	0.212	0.317	0.085	0.039	0.503	-0.024	0.007	-0.27	-0.051	-0.015	0.081	-0.022	-0.107	0.28	0.218	0.001	-0.107	0.114	-0.027	-0.225	0.182	0.019	-0.02	-0.036	0.358	0.169	-0.119	-0.184	0.196	0.073	n	0.375	-0.233	-0.082
	Symbol: Ste	41	41	41	41	41	41	41	41	41	41	41	41	41	41	41	41	41	41	41	41	41	41	41	41	41	41	41	41	41	41	41	41	41	41	41	41	41	41	41	41	41	41	41	41	41	41	41	41
	Ste on Chr 5 @ 88.005187 Mb
	sulfotransferase, estrogen preferring
	Trait 46: LV_G_0106_M::A_51_P383228	-0.216	-0.157	0.005	-0.022	-0.118	-0.118	-0.016	-0.032	0.037	0.015	0.33	0.227	-0.158	0.21	-0.052	0.183	0.186	-0.269	0.136	-0.256	0.136	-0.4	-0.168	-0.19	0.054	0.194	-0.145	0.437	0.214	-0.104	0.094	0.28	0.07	-0.073	0.234	-0.293	-0.157	-0.189	0.38	0.094	0.232	-0.293	0.021	-0.031	0.273	n	-0.022	0.085
	Symbol: Titf1	41	41	41	41	41	41	41	41	41	41	41	41	41	41	41	41	41	41	41	41	41	41	41	41	41	41	41	41	41	41	41	41	41	41	41	41	41	41	41	41	41	41	41	41	41	41	41	41
	Titf1 on Chr 12 @ 57.634028 Mb
	thyroid transcription factor 1
	Trait 47: LV_G_0106_M::A_51_P323291	0.078	0.02	-0.083	-0.135	0.257	-0.182	0.201	0.149	-0.088	-0.5	0.438	0.226	-0.198	-0.009	-0.396	0.239	0.366	-0.4	0.074	-0.082	0.318	-0.03	-0.069	0.138	0.074	0.293	-0.008	-0.047	0.126	-0.003	0.284	0.117	0.135	0.104	-0.278	0.016	-0.205	0.188	-0.191	0.379	0.06	0.02	0.117	0.117	-0.197	0.166	n	-0.126
	Symbol: Trim28	41	41	41	41	41	41	41	41	41	41	41	41	41	41	41	41	41	41	41	41	41	41	41	41	41	41	41	41	41	41	41	41	41	41	41	41	41	41	41	41	41	41	41	41	41	41	41	41
	Trim28 on Chr 7 @ 13.61481 Mb
	tripartite motif protein 28
	Trait 48: LV_G_0106_M::A_51_P152234	0.061	-0.084	0.257	-0.111	0.031	0.284	0.12	0.138	0.104	0.11	0.37	0.598	0.086	-0.153	0.038	-0.151	-0.165	-0.16	-0.485	0.155	0.148	-0.234	-0.147	0.02	-0.403	0.206	0.081	-0.097	-0.292	0.206	-0.13	0.029	-0.081	0.07	-0.263	0.13	-0.371	-0.057	0.076	-0.299	0.533	0.126	-0.05	0.078	-0.324	0.066	-0.043	n
	Symbol: Trip4	41	41	41	41	41	41	41	41	41	41	41	41	41	41	41	41	41	41	41	41	41	41	41	41	41	41	41	41	41	41	41	41	41	41	41	41	41	41	41	41	41	41	41	41	41	41	41	41
	Trip4 on Chr 9 @ 65.6812 Mb
	thyroid hormone receptor interactor 4
	Trait 49: LV_G_0106_M::A_51_P491886	-0.128	0.176	0.154	0.209	-0.362	0.192	-0.238	0.227	0.015	0.328	-0.367	-0.368	-0.031	0.102	0.133	-0.036	-0.248	0.361	0.461	0.109	-0.11	-0.015	0.139	0.047	-0.059	-0.339	-0.359	-0.143	-0.024	0.209	0.141	-0.093	-0.344	-0.229	0.352	0.213	0.329	0.146	0.109	0.305	-0.418	-0.237	0.197	0.168	0.181	-0.162	-0.046	-0.26
	Symbol: Trpc5	41	41	41	41	41	41	41	41	41	41	41	41	41	41	41	41	41	41	41	41	41	41	41	41	41	41	41	41	41	41	41	41	41	41	41	41	41	41	41	41	41	41	41	41	41	41	41	41
	Trpc5 on Chr X @ 140.816438 Mb
	transient receptor potential cation channel, subfamily C, member 5
	Trait 50: LV_G_0106_M::A_51_P207310	-0.158	-0.108	-0.201	0.335	-0.212	0.164	-0.021	0.239	-0.002	-0.045	0.042	0.028	-0.053	0.01	0.095	-0.215	0.105	0.06	-0.179	-0.192	-0.232	-0.013	0.02	-0.215	0.136	0.225	0.091	0.192	-0.041	0.088	0.123	0.071	-0.208	-0.113	0.359	-0.291	-0.062	-0.209	0.159	0.123	-0.167	0.024	-0.031	-0.039	-0.164	0.157	-0.04	-0.011
	Symbol: Txn2	41	41	41	41	41	41	41	41	41	41	41	41	41	41	41	41	41	41	41	41	41	41	41	41	41	41	41	41	41	41	41	41	41	41	41	41	41	41	41	41	41	41	41	41	41	41	41	41
	Txn2 on Chr 15 @ 77.745477 Mb
	thioredoxin 2
	Trait 51: LV_G_0106_M::A_51_P438805	-0.238	-0.31	0.135	0.046	-0.387	0.109	0.067	0.133	-0.037	-0.179	0.454	0.605	-0.294	0.14	0.043	0.103	0.242	-0.2	-0.118	-0.374	0.38	-0.097	0.163	-0.03	-0.039	0.151	-0.337	0.163	-0.156	0.23	0.095	-0.193	0.148	0.289	0.16	-0.229	-0.053	-0.194	0.157	0.053	0.322	0.154	-0.218	-0.03	-0.066	0.121	0.127	0.162
	Symbol: Txnip	41	41	41	41	41	41	41	41	41	41	41	41	41	41	41	41	41	41	41	41	41	41	41	41	41	41	41	41	41	41	41	41	41	41	41	41	41	41	41	41	41	41	41	41	41	41	41	41
	Txnip on Chr 3 @ 96.365147 Mb
	thioredoxin interacting protein
	Trait 52: LV_G_0106_M::A_51_P205385	-0.175	-0.136	0.107	0.143	-0.086	-0.142	0.051	-0.03	0.149	0.118	0.261	0.315	0.007	-0.13	0.12	-0.002	0.052	-0.254	-0.216	-0.22	0.135	0.157	-0.091	-0.213	0.286	0.321	0.379	0.123	-0.057	-0.041	-0.087	-0.076	0.193	-0.024	-0.029	-0.223	0.112	-0.063	0.063	-0.173	0.586	0.332	0.265	0.436	0.049	0.162	0.126	0.187
	Symbol: Uox	41	41	41	41	41	41	41	41	41	41	41	41	41	41	41	41	41	41	41	41	41	41	41	41	41	41	41	41	41	41	41	41	41	41	41	41	41	41	41	41	41	41	41	41	41	41	41	41
	Uox on Chr 3 @ 146.294204 Mb
	urate oxidase
[truncated: 4 more columns]
